# Supplementary material for: Design of experiments for fine-mapping quantitative trait loci in livestock populations
Source: PubMed Central journal article supplement (PMC7324978; doi:10.1186/s12863-020-00871-1), 2020-06-29
Supplement: 12863_2020_871_MOESM1_ESM.pdf [file 12863_2020_871_MOESM1_ESM.pdf]

## Additional Figures

Wittenburg *et al.* “Design of Experiments for Fine-Mapping Quantitative Trait Loci in Livestock Populations” *BMC Genetics*

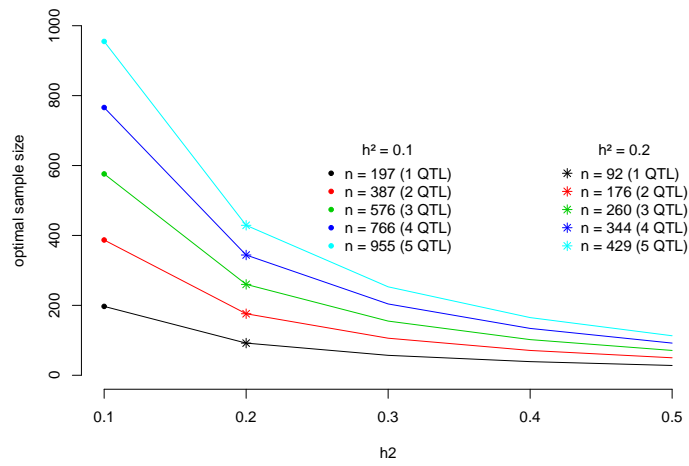

**Figure S.1** Optimal sample size estimated from the single-SNP model and depending on heritability. Pointwise type-I error was corrected using the simple $\mathcal{M}$  method.

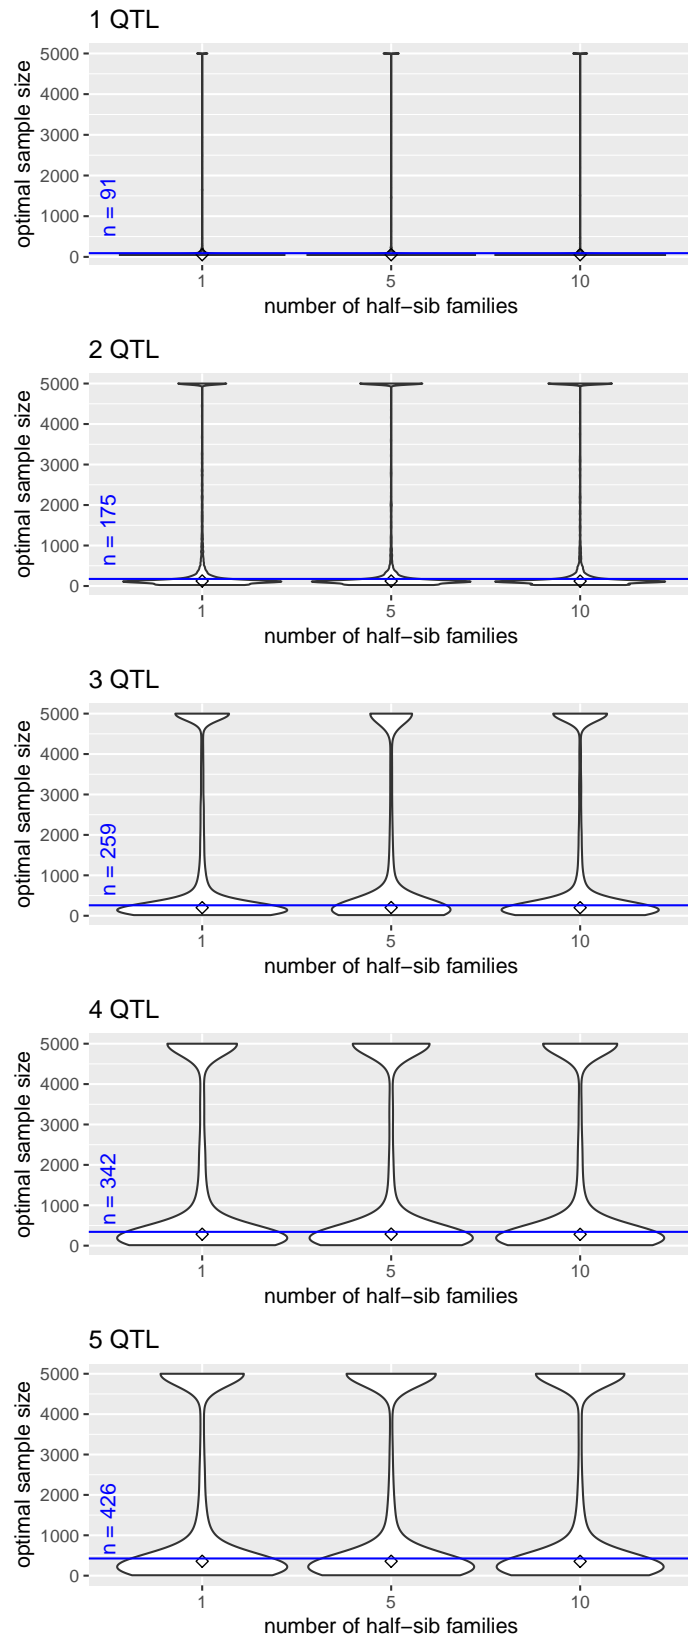

**Figure S.2** Distribution of optimal sample size. Violinplot of  $n_{opt}$  vs. number of half-sib families for different numbers of QTL signals in a multi-SNP model. The parent generation was simulated 100 times and 100 random draws of positions of QTL signals were analyzed in each run,  $h^2 = 0.2$ . The diamond indicates the median of  $n_{opt}$  and the blue line marks the results based on a single-SNP model.

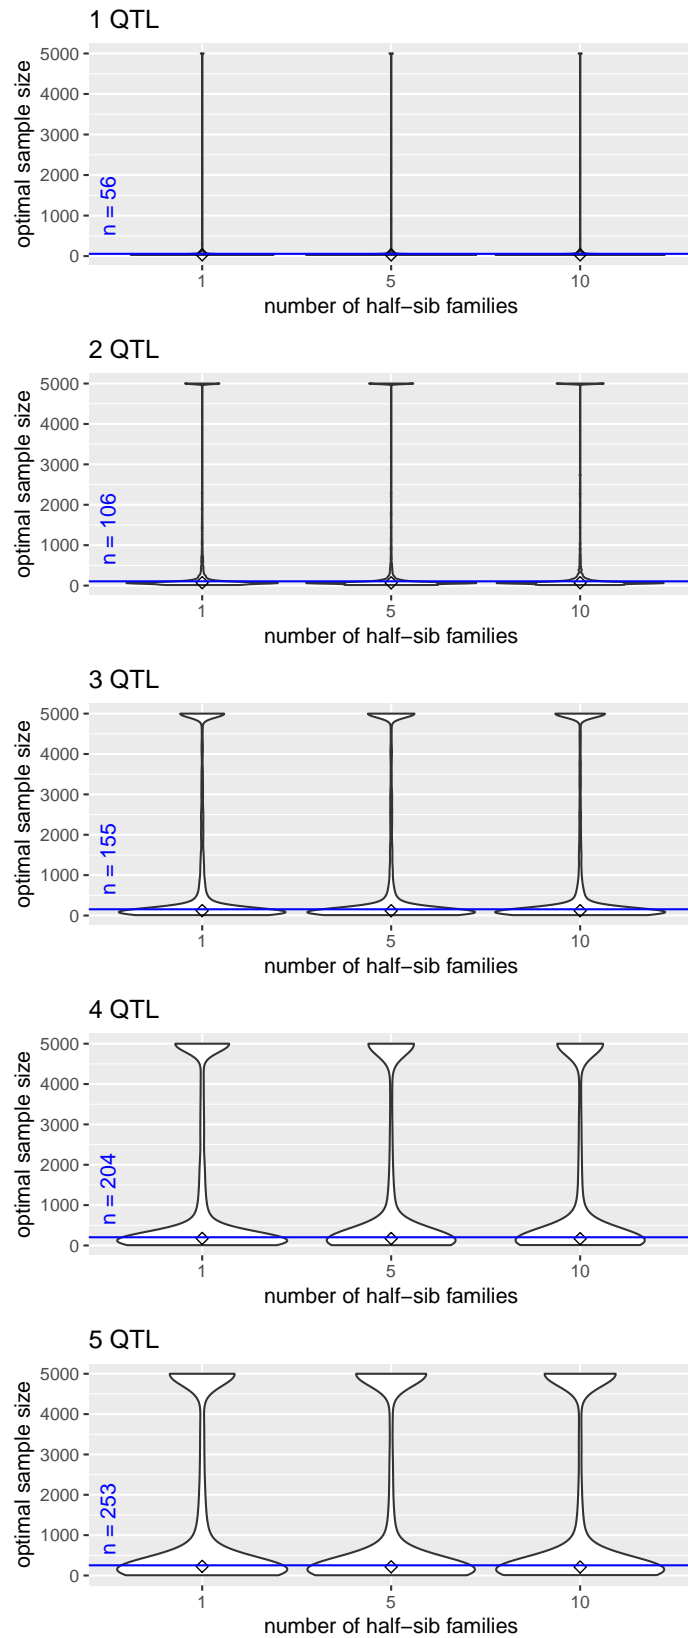

**Figure S.3** Distribution of optimal sample size. Violinplot of  $n_{opt}$  vs. number of half-sib families for different numbers of QTL signals in a multi-SNP model. The parent generation was simulated 100 times and 100 random draws of positions of QTL signals were analyzed in each run,  $h^2 = 0.3$ . The diamond indicates the median of  $n_{opt}$  and the blue line marks the results based on a single-SNP model.

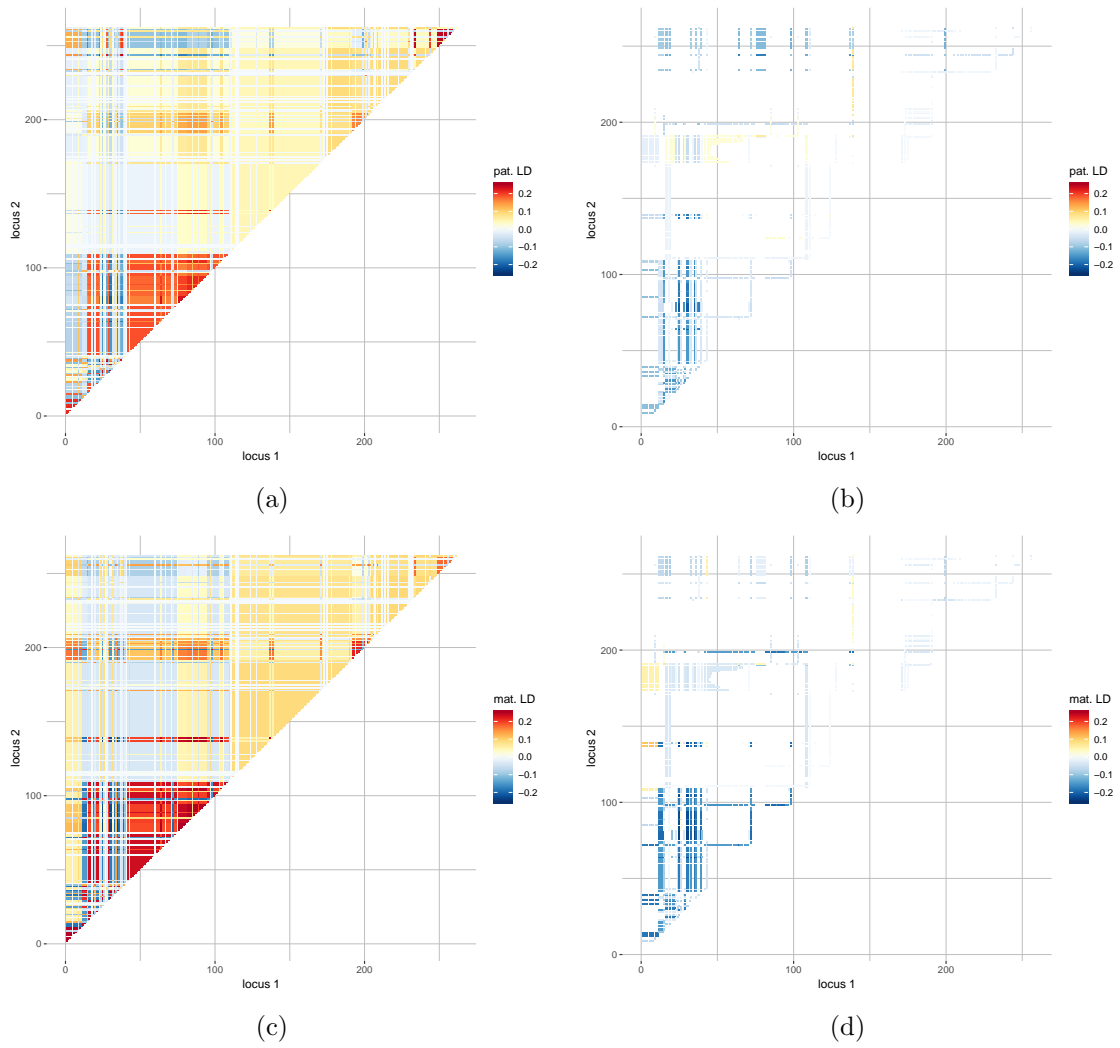

**Figure S.4** Separation of dependence between SNPs in a single simulated data set with  $N = 10$  sires. (a) Paternal covariance, (b) entries selected from paternal covariance which belong to 10% highest sample size ( $n_{opt} \geq 864$ ), (c) maternal covariance, (d) entries selected from maternal covariance which belong to 10% highest sample size. All possible SNP pairs were evaluated to detect two QTL signals ( $h^2 = 0.1$ ).

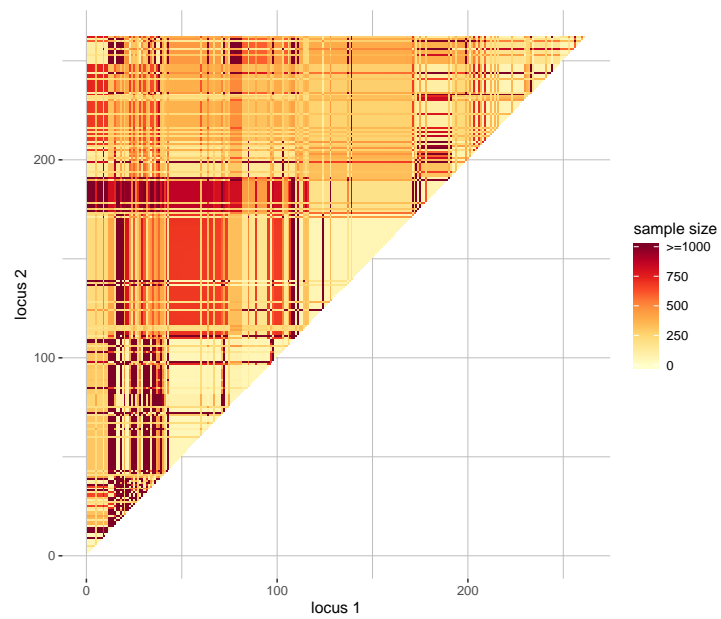

**Figure S.5** Relationship of optimal sample size with distance between QTL signals in a single simulated data set with  $N = 10$  sires. All possible SNP pairs were evaluated to detect two QTL signals ( $h^2 = 0.1$ ) based on a multi-SNP model.

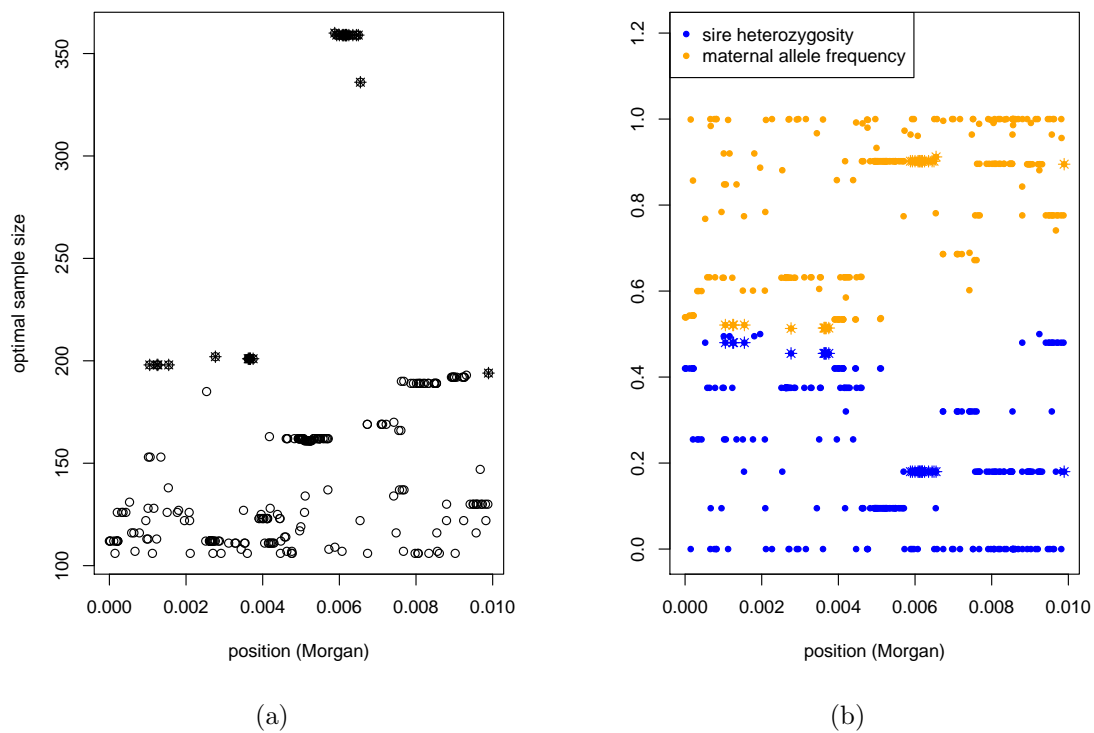

**Figure S.6** Relationship of optimal sample size with genome position. (a) Optimal sample size for detecting one QTL signal was estimated based on the multi-SNP model ( $h^2 = 0.1$ ). All possible SNP positions were evaluated. (b) Sire heterozygosity and maternal allele frequency at each SNP position. Values for SNPs that belong to 10% highest sample size ( $n_{opt} \geq 194$ ) are indicated by a star. Results are based on a single simulated data set with  $N = 10$  sires.

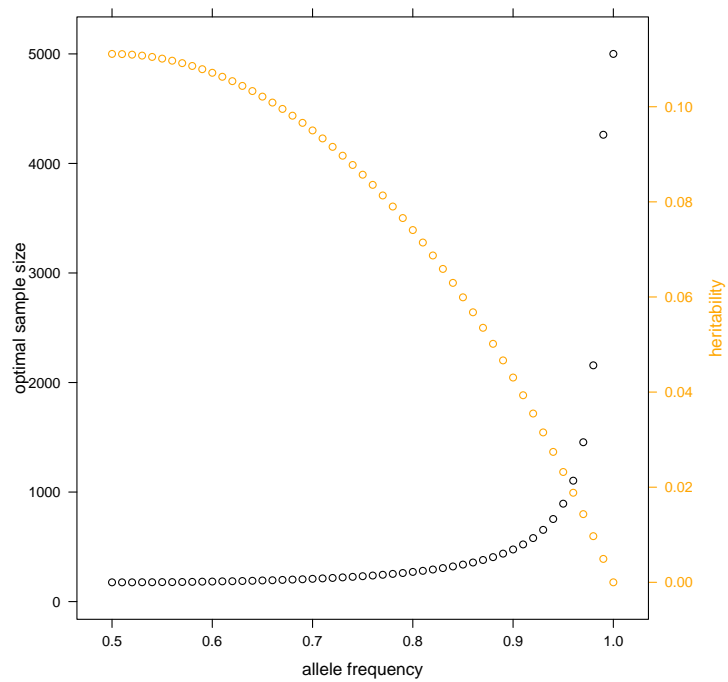

**Figure S.7** Dependence of optimal sample size on major allele frequency ( $p$ ). The relative effect size on the observed genotype level was fixed at 0.5 and multiplied by  $\sqrt{2p(1-p)}$ . Optimal sample size was estimated based on a single-SNP model.
